# Supplementary material for: Observation of regional air pollutant transport between the megacity Beijing and the North China Plain
Source: Copernicus journal article supplement (doi:10.5194/acp-16-14265-2016), 2016-11-16
Supplement: Supplementary file 1 [file acp-16-14265-2016-supplement.pdf]

Supplement of Atmos. Chem. Phys., 16, 14265–14283, 2016  
<http://www.atmos-chem-phys.net/16/14265/2016/>  
doi:10.5194/acp-16-14265-2016-supplement  
© Author(s) 2016. CC Attribution 3.0 License.

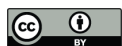

Atmospheric  
Chemistry  
and Physics  
Open Access  
EGU

*Supplement of*

## **Observation of regional air pollutant transport between the megacity Beijing and the North China Plain**

**Yingruo Li et al.**

*Correspondence to:* Tong Zhu (tzhu@pku.edu.cn)

The copyright of individual parts of the supplement might differ from the CC-BY 3.0 licence.

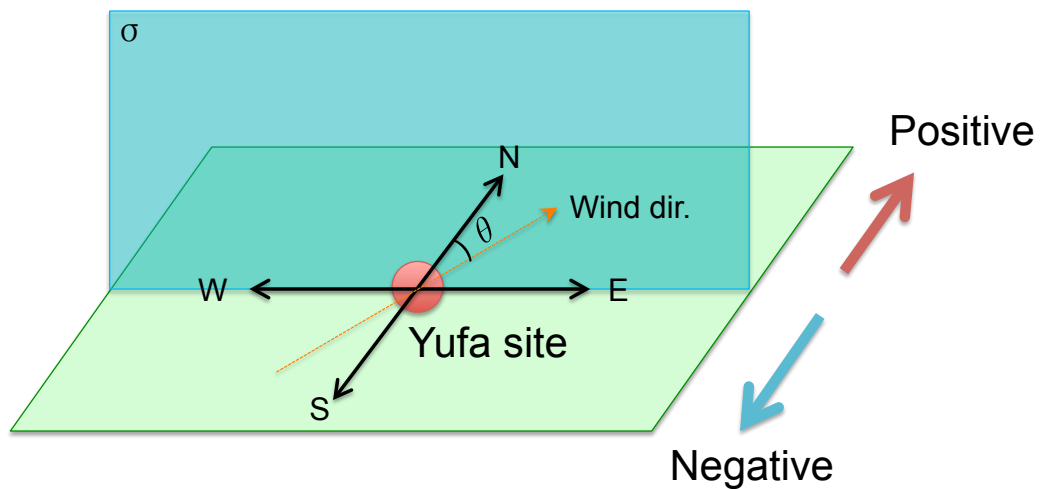

**Figure S1.** Principles for calculating gaseous pollutant flux: the wind vector along the north-south direction multiplies concentration of gaseous pollutant equals the gas pollutant flux. The direction from south to north (i.e. from the NCP to Beijing) is defined as positive, and vice versa.

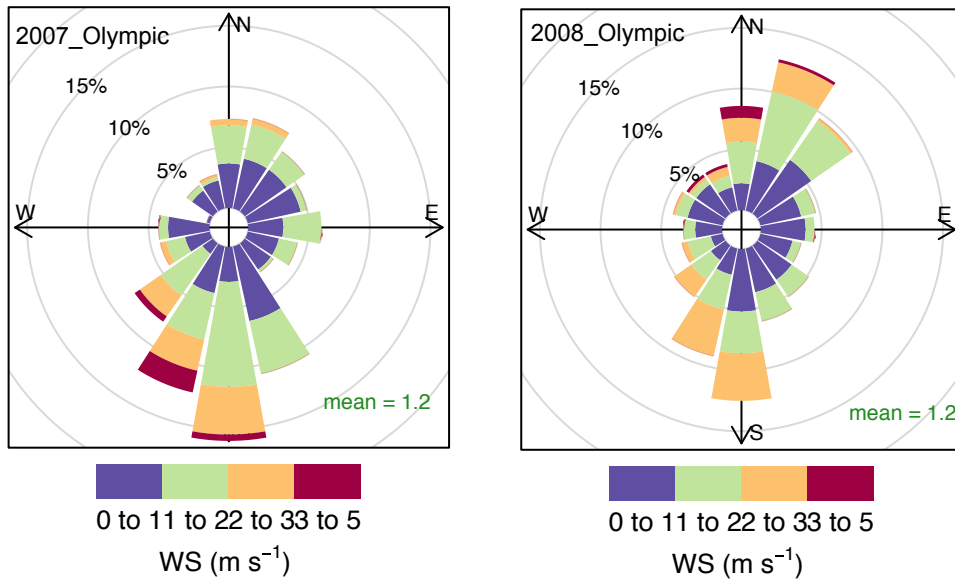

**Figure S2.** Wind rose plots during the 2008 Beijing Olympic period from 8 August 2008 to 20 September 2008 (2008\_Olympic, the right panel) and the same corresponding period of 2007 from 8 August 2007 to 20 September 2007 (2007\_Olympic, the left panel) based on hourly wind data.
